# Supplementary material
Source: HighWire-hosted journal article supplement (https://www.cmajopen.ca/highwire/filestream/85475/field_highwire_adjunct_files/0/2021-0069-1-at.pdf)
Supplement: 2021-0069-1-at.pdf [file 2021-0069-1-at.pdf]

## Supplementary Appendix

|                                                                                        |          |
|----------------------------------------------------------------------------------------|----------|
| <b>List of Collaborators</b>                                                           | <b>1</b> |
| <b>Data Safety and Monitoring Board</b>                                                | <b>2</b> |
| <b>Table S1. Risk Factors for Severe Disease</b>                                       | <b>3</b> |
| <b>Table S2. Modified Tisdale Scale</b>                                                | <b>4</b> |
| <b>Table S3. Use of telephone translation services during the trial</b>                | <b>5</b> |
| <b>Table S4. Primary and secondary outcomes in the per-protocol population (N=105)</b> | <b>6</b> |

### List of Collaborators

|                              |                       |                                |
|------------------------------|-----------------------|--------------------------------|
| <b>University of Alberta</b> | Tom Durnin            | Kayla Sage                     |
| Nasreen Ahmad                | Brett Edwards         | Karla Sanchez                  |
| Giiovanni Ferrara            | Aurora Fifi-Mah       | Supriya Save                   |
| Alim Hirji                   | Amanda Fisher         | Lisa Semeniuk                  |
| Scott Jamieson               | Aravind Ganesh        | Ranjani Somayaji               |
| Wendy Johnston               | Virginia Gonzalez     | Ericka Teleg                   |
| Meghan Linsdell              | Jamie Greenfield      | Alain Tremblay                 |
| Jennifer McCombe             | Sheilah Heal          | Gloria Roldan Urgoiti          |
| Kirstie McDermot             | Alexis K Hill         | Jan Veenhuyzen                 |
| Jeffrey Narayan              | Michael D Hill        | Adam Zedde                     |
| Manasi Rajagopal             | Jia Hu                | <b>Alberta Health Services</b> |
| Sarah Rathwell               | Kelly Johnston        | Jeffrey Bakal                  |
| Leka Ravindran               | Vikram Karnik         | Shelly Bayley                  |
| Lawrence Richer              | Sharanjit Kaur        | Lauren Bemister                |
| Ilan Schwartz                | Carol Kenney          | Lisa Bilston                   |
| Maeve Smith                  | Sundus Khan           | Megan Brierley                 |
| Penny Smyth                  | Adam Kirton           | Karen Brooks                   |
| Breanne Stewart              | Linda Knox            | Candice Cameron                |
| Taylor Strei                 | Katrina Koger         | Gillian Catena                 |
| Diane Turner                 | Alex Lemnar           | Paola Charland                 |
| Kelsey Tymkow                | Rachel Lim            | Quentin Collier                |
| Sylvia van Os                | Ayla Lo               | Ashley Drobot                  |
| Tanya Voth                   | Natalie Lopez-Leacock | Diana Horner                   |
| Rick Watts                   | Jennifer McKeage      | Reshma Karmali Alibhai         |

|                              |                     |                   |
|------------------------------|---------------------|-------------------|
| Maryna Yaskina               | Paul MacMullan      | Daryl Lacombe     |
| <b>University of Calgary</b> | Bijoy K Menon       | Marc Leduc        |
| Katayoun Alikhani            | Luanne Metz         | Delane Linkiewich |
| Jolene Allan                 | Christopher Mody    | Debbie Mallet     |
| Mohammad Almekhlafi          | Kwadwo Mponponsuo   | Jatin Patel       |
| Geri Anderson                | Jessica Ng          | Tristan Pidner    |
| Elizabeth Baguley            | Blessing Odia       | Pedro Reis        |
| Megan Barber                 | Milada Pajevic      | Mahnoush Rostami  |
| Mari Boesen                  | Remo Pannacione     | Donna A Smith     |
| Graziela Cerchiaro Farah     | Michael Parkins     | Michelle Stiphout |
| Anne Elaine Clarke           | Lorina Platon       | Nicole Tjepkema   |
| Carla Coffin                 | Sandra Rivest       | Kelly van Camp    |
| John Conly                   | Martha Rojas Zavala | Rabia Wattoo      |
| Shelagh B Coutts             | Melanie Rosario     | Becky Wong        |
| Craig Doram                  | Karla J Ryckborst   | Laurie Wright     |
| Katerina Downing             | Shahana Safdar      | Erik Youngson     |

## Data Safety and Monitoring Board

Ruth Ann Marrie (Chair), University of Manitoba

Raphael Saginur, University of Ottawa

James Dosman, University of Saskatchewan

Renee Martin, Medical University of South Carolina

Table S1. Risk Factors for Severe Disease

| Medications and Biologic Therapies                                                                                                                                                                                                                                                                                                                                                                                                                                                                                                                                                                                                                                                                                                                                                                                                                                                                                                                                                                                                                                         |
|----------------------------------------------------------------------------------------------------------------------------------------------------------------------------------------------------------------------------------------------------------------------------------------------------------------------------------------------------------------------------------------------------------------------------------------------------------------------------------------------------------------------------------------------------------------------------------------------------------------------------------------------------------------------------------------------------------------------------------------------------------------------------------------------------------------------------------------------------------------------------------------------------------------------------------------------------------------------------------------------------------------------------------------------------------------------------|
| Prednisone $\geq 7.5$ mg daily x 3 weeks (or equivalent)<br>Methotrexate (Greater than or equal to 7.5 -15 mg weekly suggested)<br>Azathioprine<br>Cyclophosphamide within the previous 6 months<br>Mitoxantrone<br>Cell depleting therapy within the previous 24 months: cladribine<br>Anti-TNF: infliximab, adalimumab, golimumab, etanercept, certolizumab<br>Anti-IL17: secukinumab, ixekizumab, brodalumab<br>mTOR inhibitors: sirolimus, everolimus<br>Mycophenolate mofetil: mycophenolic acid<br>Anti-IL12/23: Ustekinumab, risankizumab, guselkumab<br>Anti-CD28: abatacept<br>JAK2 inhibitors: tofacitinib, baricitinib, upadacitinib<br>Anti-CD20: rituximab, ocrelizumab within the previous 12 months<br>S1P inhibitors: fingolimod<br>Anti-alpha4beta7: vedolozimab<br>Anti-IL4: dupilumab<br>Anti-IgE FcR: omalizumab                                                                                                                                                                                                                                       |
| Medical Conditions and Other Risk Factors                                                                                                                                                                                                                                                                                                                                                                                                                                                                                                                                                                                                                                                                                                                                                                                                                                                                                                                                                                                                                                  |
| Age 40 or over<br>BMI >40 (calculated by self-report height and weight)<br>Hypertension (on medical treatment)<br>Current cigarette smoker<br>Bone Marrow Transplant within previous 12 months<br>Solid Organ Transplant<br>AIDS/HIV CD4 <200 within last 6 months or CD4>200 but not on treatment<br>Moderate Lymphopenia (within previous 6 months: Adults <500)<br>Chronic Kidney Disease (eGFR < 60 including people on dialysis)<br>Diabetes (on a hypoglycemic or insulin)<br>Coronary Artery Disease (non-revascularized and as per physician diagnosis in medical chart)<br>Heart Failure/Reduced LVEF (as per physician diagnosis in medical chart)<br>Chronic Lung Disease (COPD, Asthma, interstitial lung disease, as per physician diagnosis)<br>Any Current Cancer diagnosis (as per physician diagnosis)<br>Acquired or Congenital Immune Deficiency (as per physician diagnosis in medical chart)<br>Cirrhosis (normal INR and bilirubin and no history of ascites, encephalopathy, or variceal bleeding as per history and medical chart)<br>Homelessness |

Table S2. Modified Tisdale Scale

|                                                                             |          |
|-----------------------------------------------------------------------------|----------|
| <b>Age ≥68 y</b>                                                            | <b>1</b> |
| <b>Female sex</b>                                                           | <b>1</b> |
| <b>Loop diuretic use: furosemide (Lasix), bumetanide (Bumex), torsemide</b> | <b>1</b> |
| <b>Serum K<sup>+</sup> ≤3.5 mEq/L on any blood test in the last 30 days</b> | <b>2</b> |
| <b>Admission QTc ≥450 ms on any recent ECG in the last 1 year</b>           | <b>2</b> |
| <b>Acute MI</b>                                                             | <b>3</b> |
| <b>≥2 QTc-prolonging drugs (Including hydroxychloroquine)</b>               | <b>3</b> |
| <b>Sepsis</b>                                                               | <b>3</b> |
| <b>Heart failure</b>                                                        | <b>3</b> |
| <b>One QTc-prolonging drug (This will be hydroxychloroquine)</b>            | <b>3</b> |

Modified to be suitable for outpatients who were screened using history and historical medical records. Modifications: (1) a low serum potassium within the previous 30 days (if any) replaced an admission potassium, and (2) an ECG within the previous year (if any) replaced an admission ECG.

Table S3. Use of telephone translation services during the trial

| <b>Language</b> | <b>Number of Calls<sup>¶</sup></b> | <b>Language</b>    | <b>Number of Calls<sup>¶</sup></b> |
|-----------------|------------------------------------|--------------------|------------------------------------|
| Tigrinya        | 36                                 | French*            | 2                                  |
| Tagalog*        | 27                                 | Dinka              | 1                                  |
| Spanish*        | 25                                 | Nepali             | 1                                  |
| Somali          | 19                                 | Fuzhou             | 1                                  |
| Punjabi*        | 18                                 | Swahili            | 1                                  |
| Vietnamese      | 17                                 | Ukrainian          | 1                                  |
| Mandarin        | 11                                 | Uzbek              | 1                                  |
| Cantonese       | 9                                  | Malayalam          | 1                                  |
| Arabic          | 8                                  | Polish             | 1                                  |
| Cambodian       | 7                                  | Russian            | 1                                  |
| Amharic         | 7                                  | German*            | 0                                  |
| Oromo           | 7                                  | Czech*             | 0                                  |
| Hindi*          | 5                                  | Croatian*          | 0                                  |
| Farsi*          | 4                                  | Bosnian*           | 0                                  |
| Portuguese*     | 4                                  | Serbian*           | 0                                  |
| Urdu*           | 3                                  | Marathi*           | 0                                  |
| Burmese         | 2                                  | <i>Total Calls</i> | <b>220</b>                         |

\*A researcher was also available to speak this language.

¶Participants often required more than one call throughout the trial.

Table S4. Primary and secondary outcomes in the per-protocol population (N=105)

| <b>Outcome</b>                                                 | <b>Hydroxychloroquine<br/>(N=74)</b> | <b>Placebo<br/>(N=31)</b> | <b>P-value</b>    |
|----------------------------------------------------------------|--------------------------------------|---------------------------|-------------------|
| <b>Primary Outcome<sup>1</sup> - n (%)</b>                     | 1 (1.4)                              | 0 (0.0)                   | 1.00*             |
| <b>Secondary Outcomes</b>                                      |                                      |                           |                   |
| <b>Days to COVID-19 recovery - median (95% CI)<sup>2</sup></b> | 12 (9-23)                            | 13 (8-24)                 | 0.56 <sup>†</sup> |
| <b>Disposition at 30 days - n (%)</b>                          |                                      |                           | NC                |
| <b>Recovered</b>                                               | 52 (70.3)                            | 25 (80.6)                 |                   |
| <b>Ongoing symptoms, not hospitalized</b>                      | 18 (24.3)                            | 6 (19.4)                  |                   |
| <b>Unknown, not hospitalized or deceased</b>                   | 4 (5.4)                              | 0 (0.0)                   |                   |
| <b>Mortality within 30 days - n (%)</b>                        | 0 (0.0)                              | 0 (0.0)                   | NC                |
| <b>Admission to ICU within 30 days - n (%)</b>                 | 1 (1.4)                              | 0 (0.0)                   | NC                |
| <b>Hospitalization within 30 days - n (%)</b>                  | 1 (1.4)                              | 0 (0.0)                   | NC                |

\*Two-sided Fischer's exact test; <sup>†</sup>Log rank test.

<sup>1</sup>Hospitalization, invasive mechanical ventilation, or death within 30 days of treatment initiation.

<sup>2</sup>Excludes 8 subjects with missing symptom duration data in the hydroxychloroquine group

NC: secondary outcomes were not compared between groups following the pre-specified protected hierarchy.
